# Supplementary material for: Whole Genome In-Silico Analysis of South African G1P[8] Rotavirus Strains before and after Vaccine Introduction over a Period of 14 Years
Source: MDPI journal article supplement (doi:10.3390/vaccines8040609), 2020-10-14
Supplement: s1 [file s1]

# Supplementary data 6:

**Table S1: Amino acid differences in the VP7 neutralization and cytotoxic T-cell lymphocyte (CTL) epitope regions between Rotarix® and South African G1 strains**

| Amino acid difference occurrence period   | Amino acid difference and number of strains      | Region in the gene segment          |
|-------------------------------------------|--------------------------------------------------|-------------------------------------|
| Both pre-vaccine and post-vaccine strains | T91N (2), N94S (85), S123N (88), K291R (87)      | 7-1a epitope                        |
|                                           | M217T (88)                                       | 7-2 epitope                         |
|                                           | I22M (2), R28Q (1), A46V (3), T48A (20),T48I (4) | Cytotoxic T-cell lymphocyte epitope |
| Only in pre-vaccine strains               | V212I (2)                                        | 7-1b epitope                        |
|                                           | Q146R (2), S190L (1)                             | 7-2 epitope                         |
| Only in post-vaccine strains              | N147D (8)                                        | 7-2 epitope                         |
|                                           | T242A (1)                                        | 7-1b epitope                        |
|                                           | A43V (2), A46T (4)                               | Cytotoxic T-cell lymphocyte epitope |

The table indicates amino acid differences in the VP7 neutralization and CTL epitope regions that were identified when South African G1 strains were compared with cognate regions in the Rotarix® VP7 strain. The number of strain(s) bearing the amino acid difference is indicated in brackets.

**Table S2: Amino acid differences in South African post-vaccine VP7 Cytotoxic T Lymphocyte epitope and non-epitope regions**

| No of strain(s)   | Amino acid difference | Region                                                       | Amino acid property change                                       | Possible effect                                                                                                                                          |
|-------------------|-----------------------|--------------------------------------------------------------|------------------------------------------------------------------|----------------------------------------------------------------------------------------------------------------------------------------------------------|
| All 2010 strains  | S37I                  | Signal domain (H2 hydrophobic domain)                        | Hydrophilic to hydrophobic;<br>Neutral charge to neutral charge  | The change in polarity charge may alter the chemical properties of the protein                                                                           |
| Four 2011 strains | A46T                  | Signal domain (H2 hydrophobic domain)/<br>CTL epitope region | Hydrophobic to hydrophilic<br>Neutral charge to neutral charge   | The change in polarity may alter the chemical properties of the protein                                                                                  |
| One 2011 strain   | E222K                 | $\beta$ -jelly roll domain/<br>antigenic site C              | Hydrophilic to hydrophilic<br>Negative charge to positive charge | The change in charge may alter the chemical properties of the protein. The folding energy is significant for stabilizing effect on the protein structure |
| One 2014 strain   | A68D                  | Extension region of N-terminal                               | Hydrophobic to hydrophilic<br>Neutral charge to negative charge  | The change in charge may alter the physicochemical properties of the protein                                                                             |
| Two 2015 strains  | A43V                  | Signal domain (H2 hydrophobic domain)/CTL epitope region     | Hydrophobic to hydrophobic;<br>Neutral charge to Neutral charge  | The biochemical property of the region may be conserved as the amino acid property is not altered.                                                       |

The table indicates the amino acid differences that were observed in the VP7 cytotoxic T lymphocyte epitopes at positions 43 (in two post-vaccine G1 strains) and 46 (in four post-vaccine G1 strains) during post-vaccine period. Also the figure shows the amino acid differences observed in non-neutralizing regions of South African post-vaccine G1 strains that were not present during pre-vaccine period.

**Table S3: Amino acid differences in the VP4 neutralization epitope regions between Rotarix® and South African P[4] strains**

| Amino acid difference occurrence period           | Amino acid difference and number of strains                | Region in the gene segment |
|---------------------------------------------------|------------------------------------------------------------|----------------------------|
| <b>Both pre- vaccine and post vaccine strains</b> | E150D (97), N195D (3), N195G (162), N195S (5), N113D (102) | 8-1 epitope                |
|                                                   | S125N (165), S131R (170)                                   | 8-1 epitope                |
| <b>Only in pre-vaccine strains</b>                | N113 (3), S146N (1), S146G (13), N192D (5)<br>N194I (4)    | 8-1 epitope                |
|                                                   | I388L (4)                                                  | 5-1 epitope                |
|                                                   | E459D (5)                                                  | 5-3 epitope                |
| <b>Only in post-vaccine strains</b>               | T88I (1), N89S (1)                                         | 8-4 epitope                |

The table indicates amino acid differences in the VP4 neutralization regions that were identified when South African P[8] strains were compared with cognate regions in the Rotarix® P[8]. The number of strain(s) bearing the amino acid difference is indicated in brackets.

**Table S4: Amino acid differences in South African post-vaccine P[8] RVA strains**

| No of strain(s)                    | Amino acid difference(s) | Region | Amino acid property change                                       | Possible effect                             |
|------------------------------------|--------------------------|--------|------------------------------------------------------------------|---------------------------------------------|
| All 2010 eight strains             | V112I                    | VP8*   | Hydrophobic to hydrophobic;<br>Neutral to neutral charge         | No change in the physicochemical properties |
| One 2015 strain                    | V444A                    | VP5*   | Hydrophobic to hydrophobic<br>Neutral charge to neutral charge   | No change in the physicochemical properties |
| Two strains (one in 2010 and 2017) | T498I                    | VP5*   | Hydrophilic to hydrophobic<br>Neutral charge to neutral charge   | Possible change in the chemical properties  |
| All the 2014 and 2015 strains      | V600L                    | VP5*   | Hydrophobic to hydrophobic<br>Neutral charge to neutral charge   | No change in the physicochemical properties |
|                                    | K616R                    |        | Hydrophilic to hydrophilic<br>Positive charge to positive charge | No change in the physicochemical properties |

The table indicates the amino acid differences that were observed in the VP4 non-neutralization epitope sites at positions 43 (in two post-vaccine G1 strains) and 46 (in four post-vaccine G1 strains) during post-vaccine period. The asterisk indicates that VP5\* and VP8\* are proteolytic cleavage fragments of the VP4 protein.

**Table S5: Amino acid differences in South African post-vaccine I1 RVA strains**

| Strain                                                    | Amino acid difference(s) | Region      | Amino acid property change                                                        | Possible effect                                                                                       |
|-----------------------------------------------------------|--------------------------|-------------|-----------------------------------------------------------------------------------|-------------------------------------------------------------------------------------------------------|
| Strain RVA/Human-wt/ZAF/UFS-NGS-MRC-DPRU15948/2017/G1P[8] | Y353H                    | Non-epitope | Hydrophilic to hydrophilic; Neutral charge to positive (10%)/neutral charge (90%) | The change in charge and destabilization effect might alter physicochemical properties of the protein |

The table indicates the only amino acid difference that was observed in one post-vaccine I1 strain when comparison of South African pre and post-vaccine strains was performed.

**Table S6: Amino acid differences in South African post-vaccine R1 RVA strains**

| No of strains(s)                                  | Amino acid difference(s) | Region                               | Amino acid property change                                       | Possible effect                                                                   |
|---------------------------------------------------|--------------------------|--------------------------------------|------------------------------------------------------------------|-----------------------------------------------------------------------------------|
| All the 2010 strains                              | L167M                    | N-terminal domain                    | Hydrophobic to hydrophobic;<br>Neutral charge to neutral charge  | The polarity change may alter biochemical properties of the protein               |
|                                                   | T352N                    | Polymerase domain (Finger subdomain) | Hydrophilic to hydrophilic;<br>Neutral charge to Neutral charge  |                                                                                   |
|                                                   | A1028S                   | C-terminal domain                    | Hydrophobic to hydrophilic<br>Neutral charge to neutral charge   |                                                                                   |
| Four of the 2011 strains                          | K164R                    | N-terminal domain                    | Hydrophilic to hydrophilic<br>Positive charge to positive charge | The change in charge may alter biochemical properties of the protein              |
|                                                   | I279V,V301A              | N-terminal domain                    | Hydrophobic to hydrophobic<br>Neutral charge to neutral charge   |                                                                                   |
|                                                   | K898T                    | C-terminal domain                    | Hydrophilic to hydrophilic<br>Positive charge to neutral charge  |                                                                                   |
| All the 2014 and 2015 strains                     | K96R                     | N-terminal domain                    | Hydrophilic to hydrophobic                                       | The change in charge and polarity may alter biochemical properties of the protein |
|                                                   | K164R                    |                                      | Positive charge to positive charge                               |                                                                                   |
|                                                   | D286N                    |                                      | Hydrophilic to hydrophilic<br>Negative charge to neutral charge  |                                                                                   |
| Strain RVA/Human-wt/ZAF/MRC-DPRU15948/2017/G1P[8] | I231T                    | N-terminal domain                    | Hydrophobic to hydrophilic<br>Neutral charge to neutral charge   | The polarity change may alter biochemical properties of the protein               |
|                                                   | P969L                    | C-terminal domain                    | Hydrophobic to hydrophobic<br>Neutral charge to neutral charge   |                                                                                   |

The table indicates the amino acid difference that were observed during post-vaccine period in different South African VP1 RVA when compared to cognate regions in pre-vaccine strains.

**Table S7: Amino acid differences in South African post-vaccine C1 RVA strains**

| No of strain (s)                               | Amino acid difference(s) | Region                      | Amino acid property change                                        | Possible effect                                                            |
|------------------------------------------------|--------------------------|-----------------------------|-------------------------------------------------------------------|----------------------------------------------------------------------------|
| All the 2010 strains                           | R44K                     | Nucleic acid binding domain | Hydrophilic to hydrophilic;<br>Positive charge to positive charge | No effect on the physicochemical properties of the protein                 |
| Four of the 2011 strains                       | N30E                     | Nucleic acid binding domain | Hydrophilic to hydrophilic<br>Neutral charge to negative charge   | The mutations may not alter the biochemical properties of the protein      |
|                                                | T32N                     |                             | Hydrophilic to hydrophilic<br>Neutral charge to neutral charge    |                                                                            |
| Strain RVA/Human-wt/ZAF/MRC-DPRU83/2011/G1P[8] | P14L                     | Nucleic acid binding domain | Hydrophobic to hydrophobic<br>Neutral charge to neutral charge    | The mutations may not alter the biochemical properties of the protein      |
|                                                | N510S                    | Principal domain            | Hydrophilic to hydrophilic<br>Neutral to neutral                  |                                                                            |
| Two 2015 strains                               | P669S                    | Principal domain            | Hydrophobic to hydrophilic<br>Neutral charge to neutral charge    | The change in polarity may alter the biochemical properties of the protein |

The table indicates the amino acid differences that were observed during the post-vaccine period in different South African VP2 RVA when compared to cognate regions in pre-vaccine strains.

**Table S8: Amino acid differences in South African post-vaccine M1 RVA strains**

| No of strain(s)                                   | Mutation(s)    | Region(s)                                                                     | Amino acid property change                                       | Possible effect                                                                  |
|---------------------------------------------------|----------------|-------------------------------------------------------------------------------|------------------------------------------------------------------|----------------------------------------------------------------------------------|
| All the 2010 strains                              | I234V          | N7-Methyltransferase                                                          | Hydrophobic to hydrophobic;<br>Neutral charge to neutral charge  | The mutation may not alter the biochemical properties of the protein             |
| Four of the 2011 strains                          | A411V and M762 | 2'-O—<br>Methyltransferase domain and phosphodiesterase domains, respectively | Hydrophobic to hydrophobic<br>Neutral charge to neutral charge   | The mutation may not alter the biochemical properties of the protein             |
| All the 2014 and 2015 strains                     | V459I and M762 | N7-Methyltransferase and phosphodiesterase domains, respectively              | Hydrophobic to hydrophobic<br>Neutral charge to neutral charge   | The mutation may not alter the biochemical properties of the protein             |
| Strain RVA/Human-wt/ZAF/MRC-DPRU15948/2017/G1P[8] | K204R          | N7-Methyltransferase domain                                                   | Hydrophilic to hydrophilic<br>Positive charge to positive charge | The mutation may potentially not alter the biochemical properties of the protein |
|                                                   | N804S          | Phosphodiesterase domain                                                      | Hydrophilic to hydrophilic<br>Neutral charge to neutral charge   |                                                                                  |

The table indicates the amino acid differences that were observed during the post-vaccine period in different South African VP3 RVA when compared to cognate regions in pre-vaccine strains.



**Table S9: Amino acid differences in South African post-vaccine A1 RVA strains**

| No. of strain(s)                                                              | Amino acid difference(s) | Region                      | Amino acid property change                                             | Possible effect                                             |
|-------------------------------------------------------------------------------|--------------------------|-----------------------------|------------------------------------------------------------------------|-------------------------------------------------------------|
| All the 2010 strains                                                          | T120I                    | Cytoskeleton binding domain | Hydrophilic to hydrophobic;<br>Neutral charge to neutral charge        | The change in polarity may alter the biochemical properties |
|                                                                               | V266I                    | Undefined region            | Hydrophobic to hydrophobic;<br>Neutral charge to Neutral charge        |                                                             |
| Four of the 2011 strains                                                      | V189I,V266I,<br>I278V    | Undefined region            | Hydrophobic to hydrophobic                                             | The mutation may not alter the biochemical properties       |
|                                                                               | I341V                    | IRF-binding domain          | Neutral charge to neutral charge                                       |                                                             |
|                                                                               | D381Y                    | IRF-binding domain          | Hydrophilic to hydrophilic<br>Negative charge to neutral charge        |                                                             |
|                                                                               | Y445H                    | IRF-binding domain          | Hydrophilic to hydrophilic<br>Neutral to positive (10%)/ neutral (90%) |                                                             |
| One 2013 strain                                                               | Q132R                    | RING domain                 | Hydrophilic to hydrophilic<br>Neutral charge to positive charge        | The change in charge may alter the biochemical properties   |
| All 2014 strain and one 2015 strain RVA/Human-wt/ZAF/MRC-DPRU4357/2015/G1P[8] | R13K                     | RING domain                 | Hydrophobic to hydrophilic<br>Positive charge to positive charge       | The change in polarity may alter the biochemical properties |
|                                                                               | A259T /A298V             | Undefined region            | Hydrophobic to hydrophilic<br>Neutral charge to neutral charge         |                                                             |

The table indicates the amino acid differences that were observed during the post-vaccine period in different South African NSP1 RVA when compared to cognate regions in pre-vaccine strains.

**Table S10: Amino acid differences in South African post-vaccine N1 RVA strains**

| No of strain(s)                                       | Amino acid difference(s) | Region            | Amino acid property change                                        | Possible effect                                                 |
|-------------------------------------------------------|--------------------------|-------------------|-------------------------------------------------------------------|-----------------------------------------------------------------|
| 2010 strain RVA/Human-wt/ZAF/MRC-DPRU2061/2010/G1P[8] | E73K                     | N terminal domain | Hydrophilic to hydrophilic;<br>Negative charge to positive charge | The change in charge may alter the biochemical properties       |
| Four 2011 strains                                     | V254P                    | C terminal domain | Hydrophobic to hydrophobic<br>Neutral charge to neutral charge    | The mutation may not alter the biochemical properties           |
| 2014 Strain RVA/Human-wt/ZAF/MRC-DPRU143/2014/G1P[8]  | P299S                    | C terminal domain | Hydrophobic to hydrophilic<br>Neutral charge to neutral charge    | The change in charge may alter the functionality of the protein |

The table indicates the amino acid differences that were observed during the post-vaccine period in different South African NSP2 RVA when compared to cognate regions in pre-vaccine strains.

**Table S11: Amino acid differences in South African post-vaccine T1 RVA strains**

| No of strain(s)                                           | Amino acid difference (s) | Region              | Amino acid property change                                       | Possible effect                                             |
|-----------------------------------------------------------|---------------------------|---------------------|------------------------------------------------------------------|-------------------------------------------------------------|
| <b>Two 2015 strains</b>                                   | S169F                     | Dimerization domain | Hydrophilic to hydrophobic;<br>Neutral charge to neutral charge  | The change in polarity may alter the biochemical properties |
|                                                           | N215S                     | C-terminal domain   | Hydrophilic to hydrophilic;<br>Neutral charge to neutral charge  |                                                             |
| <b>2014 strain RVA/Human-wt/ZAF/MRC-DPRU65/2014/G1P[8</b> | Y204F                     | Dimerization domain | Hydrophilic to hydrophobic;<br>Neutral charge to neutral charge  | The change in polarity may alter the biochemical properties |
|                                                           | K256R                     | C-terminal domain   | Hydrophilic to hydrophilic<br>Positive charge to positive charge |                                                             |

The table indicates the amino acid differences that were observed during the post-vaccine period in different South African NSP3 RVA when compared to cognate regions in pre-vaccine strains.

**Table S12: Amino acid differences in South African post-vaccine E1 RVA strains**

| No of strain(s)                                   | Amino acid difference (s) | Region                                    | Amino acid property change                                        | Possible effect                                             |
|---------------------------------------------------|---------------------------|-------------------------------------------|-------------------------------------------------------------------|-------------------------------------------------------------|
| All 2010 strains                                  | V73I                      | N terminal hydrophobic domain 3 (H3)      | Hydrophobic to hydrophobic;<br>Neutral charge to neutral charge   | The mutation may not alter the biochemical properties       |
| Strain RVA/Human-wt/ZAF/MRC-DPRU83/2011/G1P[8]    | D157E                     | Tubulin binding domain/AS-I               | Hydrophilic to hydrophilic;<br>Negative charge to negative charge | The mutation may not alter the biochemical properties       |
| Strain RVA/Human-wt/ZAF/MRC-DPRU15948/2017/G1P[8] | V13I                      | N-terminal hydrophobic domain 1(H1)/AS-IV | Hydrophobic to hydrophobic;<br>Neutral charge to neutral charge   | The mutation may not alter the biochemical properties       |
|                                                   | D157E                     | Tubulin binding domain/AS-I               | Hydrophilic to hydrophilic;<br>Negative charge to negative charge | The mutation may not alter the biochemical properties       |
|                                                   | E167G                     | DLP-binding region/AS-I                   | Hydrophilic to hydrophobic<br>Negative to neutral charge          | The change in polarity may alter the biochemical properties |

The table indicates the amino acid differences that were observed during the post-vaccine period in different South African NSP3 RVA when compared to cognate regions in pre-vaccine strains.

**Table S13: Amino acid differences in South African post-vaccine H1 RVA strains**

| No of strain(s)   | Amino acid difference(s) | Region                    | Amino acid property change                                        | Possible effect                                             |
|-------------------|--------------------------|---------------------------|-------------------------------------------------------------------|-------------------------------------------------------------|
| Four 2010 strains | S22L                     | N-terminal binding domain | Hydrophilic to hydrophobic;<br>Neutral charge to neutral charge   | The change in polarity may alter the biochemical properties |
| Four 2011 strains | D157E                    | C-terminal binding domain | Hydrophilic to hydrophilic;<br>Positive charge to negative charge | The change in charge may alter the biochemical properties   |

The table indicates the amino acid differences that were observed during the post-vaccine period in different South African NSP3 RVA when compared to cognate regions in pre-vaccine strains.
