# Supplementary material for: Whole Genome In-Silico Analysis of South African G1P[8] Rotavirus Strains before and after Vaccine Introduction over a Period of 14 Years
Source: MDPI journal article supplement (doi:10.3390/vaccines8040609), 2020-10-14
Supplement: s1 [file s1]

**Table S1. Whole genotype constellations of 103 sequenced South African G1P[8] rotavirus strains and 68 South African G1P[8] strains acquired from GenBank**

| Gene segment                                          | VP7  | VP7 Lineage | VP4  | VP4 Lineage | VP6  | VP1  | VP2  | VP3  | NSP1 | NSP2 | NSP3 | NSP4 | NSP5 |
|-------------------------------------------------------|------|-------------|------|-------------|------|------|------|------|------|------|------|------|------|
| Base pair size for full length sequences              | 1062 |             | 2359 |             | 1356 | 3302 | 2717 | 2591 | 1567 | 1059 | 1074 | 750  | 664  |
| Base pair size for open reading frame (ORF) sequences | 978  |             | 2325 |             | 1191 | 3264 | 2682 | 2505 | 1458 | 951  | 930  | 525  | 591  |
| Genotype constellations                               |      |             |      |             |      |      |      |      |      |      |      |      |      |
| Sequenced for this study                              |      |             |      |             |      |      |      |      |      |      |      |      |      |
| Pre-vaccine strains                                   |      |             |      |             |      |      |      |      |      |      |      |      |      |
| 1 RVA/Human-wt/ZAF/UFS-NGS-MRC-DPRU3883/2002/G1P[8]   | G1   | II          | P[8] | III         | I1   | R1   | C1   | M1   | A1   | N1   | T1   | E1   | H1   |
| 2 RVA/Human-wt/ZAF/UFS-NGS-MRC-DPRU3892/2002/G1P[8]   | G1   | II          | P[8] | III         | I1   | R1   | C1   | M1   | A1   | N1   | T1   | E1   | H1   |
| 3 RVA/Human-wt/ZAF/UFS-NGS-MRC-DPRU3951/2002/G1P[8]   | G1   | II          | P[8] | III         | I1   | R1   | C1   | M1   | A1   | N1   | T1   | E1   | H1   |
| 4 RVA/Human-wt/ZAF/UFS-NGS-MRC-DPRU3956/2002/G1P[8]   | G1   | II          | P[8] | III         | I1   | R1   | C1   | M1   | A1   | N1   | T1   | E1   | H1   |
| 5 RVA/Human-wt/ZAF/UFS-NGS-MRC-DPRU4018/2002/G1P[8]   | G1   | II          | P[8] | III         | I1   | R1   | C1   | M1   | A1   | N1   | T1   | E1   | H1   |
| 6 RVA/Human-wt/ZAF/UFS-NGS-MRC-DPRU4019/2002/G1P[8]   | G1   | II          | P[8] | III         | I1   | R1   | C1   | M1   | A1   | N1   | T1   | E1   | H1   |
| 7 RVA/Human-wt/ZAF/UFS-NGS-MRC-DPRU4023/2002/G1P[8]   | G1   | II          | P[8] | III         | I1   | R1   | C1   | M1   | A1   | N1   | T1   | E1   | H1   |
| 8 RVA/Human-wt/ZAF/UFS-NGS-MRC-DPRU4024/2002/G1P[8]   | G1   | I           | P[8] | III         | I1   | R1   | C1   | M1   | A1   | N1   | T1   | E1   | H1   |
| 9 RVA/Human-wt/ZAF/UFS-NGS-MRC-DPRU4026/2002/G1P[8]   | G1   | II          | P[8] | III         | I1   | R1   | C1   | M1   | A1   | N1   | T1   | E1   | H1   |
| 10 RVA/Human-wt/ZAF/UFS-NGS-MRC-DPRU4049/2002/G1P[8]  | G1   | II          | P[8] | III         | I1   | R1   | C1   | M1   | A1   | N1   | T1   | E1   | H1   |
| 11 RVA/Human-wt/ZAF/UFS-NGS-MRC-DPRU4055/2002/G1P[8]  | G1   | II          | P[8] | III         | I1   | R1   | C1   | M1   | A1   | N1   | T1   | E1   | H1   |
| 12 RVA/Human-wt/ZAF/UFS-NGS-MRC-DPRU4102/2002/G1P[8]  | G1   | II          | P[8] | III         | I1   | R1   | C1   | M1   | A1   | N1   | T1   | E1   | H1   |
| 13 RVA/Human-wt/ZAF/UFS-NGS-MRC-DPRU4269/2002/G1P[8]  | G1   | II          | P[8] | III         | I1   | R1   | C1   | M1   | A1   | N1   | T1   | E1   | H1   |
| 14 RVA/Human-wt/ZAF/UFS-NGS-MRC-DPRU4271/2002/G1P[8]  | G1   | II          | P[8] | III         | I1   | R1   | C1   | M1   | A1   | N1   | T1   | E1   | H1   |
| 15 RVA/Human-wt/ZAF/UFS-NGS-MRC-DPRU456/2003/G1P[8]   | G1   | II          | P[8] | III         | I1   | R1   | C1   | M1   | A1   | N1   | T1   | E1   | H1   |
| 16 RVA/Human-wt/ZAF/UFS-NGS-MRC-DPRU493/2003/G1P[8]   | G1   | II          | P[8] | III         | I1   | R1   | C1   | M1   | A1   | N1   | T1   | E1   | H1   |
| 17 RVA/Human-wt/ZAF/UFS-NGS-MRC-DPRU609/2003/G1P[8]   | G1   | II          | P[8] | III         | I1   | R1   | C1   | M1   | A1   | N1   | T1   | E1   | H1   |
| 18 RVA/Human-wt/ZAF/UFS-NGS-MRC-DPRU632/2003/G1P[8]   | G1   | II          | P[8] | III         | I1   | R1   | C1   | M1   | A1   | N1   | T1   | E1   | H1   |
| 19 RVA/Human-wt/ZAF/UFS-NGS-MRC-DPRU2117/2003/G1P[8]  | G1   | II          | P[8] | III         | I1   | R1   | C1   | M1   | A1   | N1   | T1   | E1   | H1   |
| 20 RVA/Human-wt/ZAF/UFS-NGS-MRC-DPRU2145/2003/G1P[8]  | G1   | II          | P[8] | III         | I1   | R1   | C1   | M1   | A1   | N1   | T1   | E1   | H1   |
| 21 RVA/Human-wt/ZAF/UFS-NGS-MRC-DPRU2156/2003/G1P[8]  | G1   | II          | P[8] | III         | I1   | R1   | C1   | M1   | A1   | N1   | T1   | E1   | H1   |
| 22 RVA/Human-wt/ZAF/UFS-NGS-MRC-DPRU1104/2004/G1P[8]  | G1   | II          | P[8] | III         | I1   | R1   | C1   | M1   | A1   | N1   | T1   | E1   | H1   |
| 23 RVA/Human-wt/ZAF/UFS-NGS-MRC-DPRU1116/2004/G1P[8]  | G1   | I           | P[8] | III         | I1   | R1   | C1   | M1   | A1   | N1   | T1   | E1   | H1   |
| 24 RVA/Human-wt/ZAF/UFS-NGS-MRC-DPRU1131/2004/G1P[8]  | G1   | II          | P[8] | III         | I1   | R1   | C1   | M1   | A1   | N1   | T1   | E1   | H1   |
| 25 RVA/Human-wt/ZAF/UFS-NGS-MRC-DPRU1135/2004/G1P[8]  | G1   | II          | P[8] | III         | I1   | R1   | C1   | M1   | A1   | N1   | T1   | E1   | H1   |
| 26 RVA/Human-wt/ZAF/UFS-NGS-MRC-DPRU1139/2004/G1P[8]  | G1   | II          | P[8] | III         | I1   | R1   | C1   | M1   | A1   | N1   | T1   | E1   | H1   |
| 27 RVA/Human-wt/ZAF/UFS-NGS-MRC-DPRU1145/2004/G1P[8]  | G1   | II          | P[8] | III         | I1   | R1   | C1   | M1   | A1   | N1   | T1   | E1   | H1   |
| 28 RVA/Human-wt/ZAF/UFS-NGS-MRC-DPRU1148/2004/G1P[8]  | G1   | II          | P[8] | III         | I1   | R1   | C1   | M1   | A1   | N1   | T1   | E1   | H1   |
| 29 RVA/Human-wt/ZAF/UFS-NGS-MRC-DPRU1184/2004/G1P[8]  | G1   | II          | P[8] | III         | I1   | R1   | C1   | M1   | A1   | N1   | T1   | E1   | H1   |
| 30 RVA/Human-wt/ZAF/UFS-NGS-MRC-DPRU1192/2004/G1P[8]  | G1   | II          | P[8] | III         | I1   | R1   | C1   | M1   | A1   | N1   | T1   | E1   | H1   |
| 31 RVA/Human-wt/ZAF/UFS-NGS-MRC-DPRU1205/2004/G1P[8]  | G1   | II          | P[8] | III         | I1   | R1   | C1   | M1   | A1   | N1   | T1   | E1   | H1   |
| 32 RVA/Human-wt/ZAF/UFS-NGS-MRC-DPRU1230/2004/G1P[8]  | G1   | II          | P[8] | III         | I1   | R1   | C1   | M1   | A1   | N1   | T1   | E1   | H1   |
| 33 RVA/Human-wt/ZAF/UFS-NGS-MRC-DPRU1287/2004/G1P[8]  | G1   | II          | P[8] | III         | I1   | R1   | C1   | M1   | A1   | N1   | T1   | E1   | H1   |
| 34 RVA/Human-wt/ZAF/UFS-NGS-MRC-DPRU3410/2004/G1P[8]  | G1   | II          | P[8] | III         | I1   | R1   | C1   | M1   | A1   | N1   | T1   | E1   | H1   |
| 35 RVA/Human-wt/ZAF/UFS-NGS-MRC-DPRU3449/2004/G1P[8]  | G1   | II          | P[8] | III         | I1   | R1   | C1   | M1   | A1   | N1   | T1   | E1   | H1   |
| 36 RVA/Human-wt/ZAF/UFS-NGS-MRC-DPRU451/2005/G1P[8]   | G1   | II          | P[8] | III         | I1   | R1   | C1   | M1   | A1   | N1   | T1   | E1   | H1   |
| 37 RVA/Human-wt/ZAF/UFS-NGS-MRC-DPRU658/2005/G1P[8]   | G1   | I           | P[8] | III         | I1   | R1   | C1   | M1   | A1   | N1   | T1   | E1   | H1   |
| 38 RVA/Human-wt/ZAF/UFS-NGS-MRC-DPRU682/2005/G1P[8]   | G1   | II          | P[8] | IV          | I1   | R1   | C1   | M1   | A1   | N1   | T1   | E1   | H1   |
| 39 RVA/Human-wt/ZAF/UFS-NGS-MRC-DPRU687/2005/G1P[8]   | G1   | II          | P[8] | III         | I1   | R1   | C1   | M1   | A1   | N1   | T1   | E1   | H1   |
| 40 RVA/Human-wt/ZAF/UFS-NGS-MRC-DPRU745/2005/G1P[8]   | G1   | I           | P[8] | III         | I1   | R1   | C1   | M1   | A1   | N1   | T1   | E1   | H1   |
| 41 RVA/Human-wt/ZAF/UFS-NGS-MRC-DPRU747/2005/G1P[8]   | G1   | II          | P[8] | III         | I1   | R1   | C1   | M1   | A1   | N1   | T1   | E1   | H1   |
| 42 RVA/Human-wt/ZAF/UFS-NGS-MRC-DPRU732/2006/G1P[8]   | G1   | I           | P[8] | III         | I1   | R1   | C1   | M1   | A1   | N1   | T1   | E1   | H1   |
| 43 RVA/Human-wt/ZAF/UFS-NGS-MRC-DPRU749/2006/G1P[8]   | G1   | I           | P[8] | III         | I1   | R1   | C1   | M1   | A1   | N1   | T1   | E1   | H1   |
| 44 RVA/Human-wt/ZAF/UFS-NGS-MRC-DPRU753/2006/G1P[8]   | G1   | I           | P[8] | III         | I1   | R1   | C1   | M1   | A1   | N1   | T1   | E1   | H1   |
| 45 RVA/Human-wt/ZAF/UFS-NGS-MRC-DPRU757/2006/G1P[8]   | G1   | I           | P[8] | III         | I1   | R1   | C1   | M1   | A1   | N1   | T1   | E1   | H1   |
| 46 RVA/Human-wt/ZAF/UFS-NGS-MRC-DPRU768/2006/G1P[8]   | G1   | I           | P[8] | III         | I1   | R1   | C1   | M1   | A1   | N1   | T1   | E1   | H1   |
| 47 RVA/Human-wt/ZAF/UFS-NGS-MRC-DPRU783/2006/G1P[8]   | G1   | I           | P[8] | III         | I1   | R1   | C1   | M1   | A1   | N1   | T1   | E1   | H1   |
| 48 RVA/Human-wt/ZAF/UFS-NGS-MRC-DPRU849/2006/G1P[8]   | G1   | I           | P[8] | III         | I1   | R1   | C1   | M1   | A1   | N1   | T1   | E1   | H1   |
| 49 RVA/Human-wt/ZAF/UFS-NGS-MRC-DPRU902/2006/G1P[8]   | G1   | I           | P[8] | III         | I1   | R1   | C1   | M1   | A1   | N1   | T1   | E1   | H1   |
| 50 RVA/Human-wt/ZAF/UFS-NGS-MRC-DPRU981/2006/G1P[8]   | G1   | I           | P[8] | III         | I1   | R1   | C1   | M1   | A1   | N1   | T1   | E1   | H1   |
| 51 RVA/Human-wt/ZAF/UFS-NGS-MRC-DPRU999/2006/G1P[8]   | G1   | I           | P[8] | III         | I1   | R1   | C1   | M1   | A1   | N1   | T1   | E1   | H1   |
| 52 RVA/Human-wt/ZAF/UFS-NGS-MRC-DPRU1002/2006/G1P[8]  | G1   | I           | P[8] | III         | I1   | R1   | C1   | M1   | A1   | N1   | T1   | E1   | H1   |
| 53 RVA/Human-wt/ZAF/UFS-NGS-MRC-DPRU1005/2006/G1P[8]  | G1   | I           | P[8] | III         | I1   | R1   | C1   | M1   | A1   | N1   | T1   | E1   | H1   |
| 54 RVA/Human-wt/ZAF/UFS-NGS-MRC-DPRU1006/2006/G1P[8]  | G1   | II          | P[8] | III         | I1   | R1   | C1   | M1   | A1   | N1   | T1   | E1   | H1   |
| 55 RVA/Human-wt/ZAF/UFS-NGS-MRC-DPRU1007/2006/G1P[8]  | G1   | I           | P[8] | III         | I1   | R1   | C1   | M1   | A1   | N1   | T1   | E1   | H1   |
| 56 RVA/Human-wt/ZAF/UFS-NGS-MRC-DPRU1009/2006/G1P[8]  | G1   | II          | P[8] | III         | I1   | R1   | C1   | M1   | A1   | N1   | T1   | E1   | H1   |
| 57 RVA/Human-wt/ZAF/UFS-NGS-MRC-DPRU1012/2006/G1P[8]  | G1   | I           | P[8] | III         | I1   | R1   | C1   | M1   | A1   | N1   | T1   | E1   | H1   |
| 58 RVA/Human-wt/ZAF/UFS-NGS-MRC-DPRU1015/2006/G1P[8]  | G1   | I           | P[8] | III         | I1   | R1   | C1   | M1   | A1   | N1   | T1   | E1   | H1   |
| 59 RVA/Human-wt/ZAF/UFS-NGS-MRC-DPRU1019/2006/G1P[8]  | G1   | II          | P[8] | III         | I1   | R1   | C1   | M1   | A1   | N1   | T1   | E1   | H1   |
| 60 RVA/Human-wt/ZAF/UFS-NGS-MRC-DPRU1030/2006/G1P[8]  | G1   | I           | P[8] | III         | I1   | R1   | C1   | M1   | A1   | N1   | T1   | E1   | H1   |
| 61 RVA/Human-wt/ZAF/UFS-NGS-MRC-DPRU1039/2006/G1P[8]  | G1   | I           | P[8] | III         | I1   | R1   | C1   | M1   | A1   | N1   | T1   | E1   | H1   |
| 62 RVA/Human-wt/ZAF/UFS-NGS-MRC-DPRU1041/2006/G1P[8]  | G1   | I           | P[8] | III         | I1   | R1   | C1   | M1   | A1   | N1   | T1   | E1   | H1   |
| 63 RVA/Human-wt/ZAF/UFS-NGS-MRC-DPRU3433/2006/G1P[8]  | G1   | I           | P[8] | IV          | I1   | R1   | C1   | M1   | A1   | N1   | T1   | E1   | H1   |
| 64 RVA/Human-wt/ZAF/UFS-NGS-MRC-DPRU147/2007/G1P[8]   | G1   | I           | P[8] | III         | I1   | R1   | C1   | M1   | A1   | N1   | T1   | E1   | H1   |
| 65 RVA/Human-wt/ZAF/UFS-NGS-MRC-DPRU792/2007/G1P[8]   | G1   | I           | P[8] | III         | I1   | R1   | C1   | M1   | A1   | N1   | T1   | E1   | H1   |
| 66 RVA/Human-wt/ZAF/UFS-NGS-MRC-DPRU793/2007/G1P[8]   | G1   | II          | P[8] | III         | I1   | R1   | C1   | M1   | A1   | N1   | T1   | E1   | H1   |
| 67 RVA/Human-wt/ZAF/UFS-NGS-MRC-DPRU799/2007/G1P[8]   | G1   | I           | P[8] | III         | I1   | R1   | C1   | M1   | A1   | N1   | T1   | E1   | H1   |
| 68 RVA/Human-wt/ZAF/UFS-NGS-MRC-DPRU1273/2007/G1P[8]  | G1   | I           | P[8] | III         | I1   | R1   | C1   | M1   | A1   | N1   | T1   | E1   | H1   |
| 69 RVA/Human-wt/ZAF/UFS-NGS-MRC-DPRU1302/2007/G1P[8]  | G1   | II          | P[8] | III         | I1   | R1   | C1   | M1   | A1   | N1   | T1   | E1   | H1   |
| 70 RVA/Human-wt/ZAF/UFS-NGS-MRC-DPRU1652/2007/G1P[8]  | G1   | II          | P[8] | III         | I1   | R1   | C1   | M1   | A1   | N1   | T1   | E1   | H1   |
| 71 RVA/Human-wt/ZAF/UFS-NGS-MRC-DPRU1042/2008/G1P[8]  | G1   | II          | P[8] | III         | I1   | R1   | C1   | M1   | A1   | N1   | T1   | E1   | H1   |
| 72 RVA/Human-wt/ZAF/UFS-NGS-MRC-DPRU1047/2008/G1P[8]  | G1   | I           | P[8] | III         | I1   | R1   | C1   | M1   | A1   | N1   | T1   | E1   | H1   |
| 73 RVA/Human-wt/ZAF/UFS-NGS-MRC-DPRU1048/2008/G1P[8]  | G1   | I           | P[8] | III         | I1   | R1   | C1   | M1   | A1   | N1   | T1   | E1   | H1   |
| 74 RVA/Human-wt/ZAF/UFS-NGS-MRC-DPRU1965/2008/G1P[8]  | G1   | I           | P[8] | III         | I1   | R1   | C1   | M1   | A1   | N1   | T1   | E1   | H1   |
| 75 RVA/Human-wt/ZAF/UFS-NGS-MRC-DPRU1967/2008/G1P[8]  | G1   | I           | P[8] | III         | I1   | R1   | C1   | M1   | A1   | N1   | T1   | E1   | H1   |
| 76 RVA/Human-wt/ZAF/UFS-NGS-MRC-DPRU1969/2008/G1P[8]  | G1   | I           | P[8] | III         | I1   | R1   | C1   | M1   | A1   | N1   | T1   | E1   | H1   |
| 77 RVA/Human-wt/ZAF/UFS-NGS-MRC-DPRU1970/2008/G1P[8]  | G1   | I           | P[8] | III         | I1   | R1   | C1   | M1   | A1   | N1   | T1   | E1   | H1   |
| 78 RVA/Human-wt/ZAF/UFS-NGS-MRC-DPRU1980/2008/G1P[8]  | G1   | II          | P[8] | III         | I1   | R1   | C1   | M1   | A1   | N1   | T1   | E1   | H1   |
| 79 RVA/Human-wt/ZAF/UFS-NGS-MRC-DPRU2006/2008/G1P[8]  | G1   | I           | P[8] | III         | I1   | R1   | C1   | M1   | A1   | N1   | T1   | E1   | H1   |
| 80 RVA/Human-wt/ZAF/UFS-NGS-MRC-DPRU136/2009/G1P[8]   | G1   | I           | P[8] | III         | I1   | R1   | C1   | M1   | A1   | N1   | T1   | E1   | H1   |
| 81 RVA/Human-wt/ZAF/UFS-NGS-MRC-DPRU138/2009/G1P[8]   | G1   | II          | P[8] | III         | I1   | R1   | C1   | M1   | A1   | N1   | T1   | E1   | H1   |
| 82 RVA/Human-wt/ZAF/UFS-NGS-MRC-DPRU139/2009/G1P[8]   | G1   | I           | P[8] | III         | I1   | R1   | C1   | M1   | A1   | N1   | T1   | E1   | H1   |
| 83 RVA/Human-wt/ZAF/UFS-NGS-MRC-DPRU151/2009/G1P[8]   | G1   | II          | P[8] | III         | I1   | R1   | C1   | M1   | A1   | N1   | T1   | E1   | H1   |
| 84 RVA/Human-wt/ZAF/UFS-NGS-MRC-DPRU157/2009/G1P[8]   | G1   | II          | P[8] | III         | I1   | R1   | C1   | M1   | A1   | N1   | T1   | E1   | H1   |
| 85 RVA/Human-wt/ZAF/UFS-NGS-MRC-DPRU1049/2009/G1P[8]  | G1   | I           | P[8] | III         | I1   | R1   | C1   | M1   | A1   | N1   | T1   | E1   | H1   |
| 86 RVA/Human-wt/ZAF/UFS-NGS-MRC-DPRU1093/2009/G1P[8]  | G1   | I           | P[8] | III         | I1   | R1   | C1   | M1   | A1   | N1   | T1   | E1   | H1   |
| 87 RVA/Human-wt/ZAF/UFS-NGS-MRC-DPRU1190/2009/G1P[8]  | G1   | I           | P[8] | III         | I1   | R1   | C1   | M1   | A1   | N1   | T1   | E1   | H1   |
| 88 RVA/Human-wt/ZAF/UFS-NGS-MRC-DPRU1234/2009/G1P[8]  | G1   | II          | P[8] | III         | I1   | R1   | C1   | M1   | A1   | N1   | T1   | E1   | H1   |
| 89 RVA/Human-wt/ZAF/UFS-NGS-MRC-DPRU1271/2009/G1P[8]  | G1   | II          | P[8] | III         | I1   | R1   | C1   | M1   | A1   | N1   | T1   | E1   | H1   |
| 90 RVA/Human-wt/ZAF/UFS-NGS-MRC-DPRU2280/2009/G1P[8]  | G1   | I           | P[8] | III         | I1   | R1   | C1   | M1   | A1   | N1   | T1   | E1   | H1   |
| 91 RVA/Human-wt/ZAF/UFS-NGS-MRC-DPRU2291/2009/G1P[8]  | G1   | I           | P[8] | III         | I1   | R1   | C1   | M1   | A1   | N1   | T1   | E1   | H1   |
| 92 RVA/Human-wt/ZAF/UFS-NGS-MRC-DPRU2299/2009/G1P[8]  | G1   | II          | P[8] | III         | I1   | R1   | C1   | M1   | A1   | N1   | T1   | E1   | H1   |
| Post-vaccine strains                                  |      |             |      |             |      |      |      |      |      |      |      |      |      |
| 1 RVA/Human-wt/ZAF/UFS-NGS-MRC-DPRU2021/2010/G1P[8]   | G1   | I           | P[8] | III         | I1   | R1   | C1   | M1   | A1   | N1   | T1   | E1   | H1   |
| 34 RVA/Human-wt/ZAF/UFS-NGS-MRC-DPRU2250/2013/G1P[8]  | G1   | II          | P[8] | I           | I1   | R1   | C1   | M1   | A1   | N1   | T1   | E1   | H1   |
| 35 RVA/Human-wt/ZAF/UFS-NGS-MRC-DPRU56/2014/G1P[8]    | G1   | II          | P[8] | III         | I1   | R1   | C1   | M1   | A1   | N1   | T1   | E1   | H1   |
| 36 RVA/Human-wt/ZAF/UFS-NGS-MRC-DPRU65/2014/G1P[8]    | G1   | II          | P[8] | III         | I1   | R1   | C1   | M1   | A1   | N1   | T1   | E1   | H1   |
| 37 RVA/Human-wt/ZAF/UFS-NGS-MRC-DPRU74/2014/G1P[8]    | G1   | II          | P[8] | III         | I1   | R1   | C1   | M1   | A1   | N1   | T1   | E1   | H1   |

Accession codes in GenBank  
(MT854335-MT855467)

|     |                                                    |    |    |      |     |    |    |    |    |    |    |    |    |    |
|-----|----------------------------------------------------|----|----|------|-----|----|----|----|----|----|----|----|----|----|
| 98  | RVA/Human-wt/ZAF/UF5-NGS-MRC-DPRU143/2014/G1P[8]   | G1 | II | P[8] | III | I1 | R1 | C1 | M1 | A1 | N1 | T1 | E1 | H1 |
| 99  | RVA/Human-wt/ZAF/UF5-NGS-MRC-DPRU150/2014/G1P[8]   | G1 | II | P[8] | III | I1 | R1 | C1 | M1 | A1 | N1 | T1 | E1 | H1 |
| 100 | RVA/Human-wt/ZAF/UF5-NGS-MRC-DPRU4347/2015/G1P[8]  | G1 | II | P[8] | III | I1 | R1 | C1 | M1 | A1 | N1 | T1 | E1 | H1 |
| 101 | RVA/Human-wt/ZAF/UF5-NGS-MRC-DPRU4352/2015/G1P[8]  | G1 | II | P[8] | III | I1 | R1 | C1 | M1 | A1 | N1 | T1 | E1 | H1 |
| 102 | RVA/Human-wt/ZAF/UF5-NGS-MRC-DPRU4357/2015/G1P[8]  | G1 | II | P[8] | III | I1 | R1 | C1 | M1 | A1 | N1 | T1 | E1 | H1 |
| 103 | RVA/Human-wt/ZAF/UF5-NGS-MRC-DPRU15948/2017/G1P[8] | G1 | II | P[8] | III | I1 | R1 | C1 | M1 | A1 | N1 | T1 | E1 | H1 |

Acquired from GenBank

Pre-vaccine strains

|     |                                           |    |    |      |     |    |    |    |    |    |    |    |    |    |          |
|-----|-------------------------------------------|----|----|------|-----|----|----|----|----|----|----|----|----|----|----------|
| 104 | RVA/Human-wt/ZAF/MRC-DPRU4418/2002/G1P[8] | G1 | II | P[8] | III | I1 | R1 | C1 | M1 | A1 | N1 | T1 | E1 | H1 | KJ752974 |
| 105 | RVA/Human-wt/ZAF/MRC-DPRU1192/2002/G1P[8] | G1 | II | P[8] | III | I1 | R1 | C1 | M1 | A1 | N1 | T1 | E1 | H1 | KP752554 |
| 106 | RVA/Human-wt/ZAF/MRC-DPRU6113/2002/G1P[8] | G1 | II | P[8] | III | I1 | R1 | C1 | M1 | A1 | N1 | T1 | E1 | H1 | KJ751795 |
| 107 | RVA/Human-wt/ZAF/MRC-DPRU4381/2002/G1P[8] | G1 | II | P[8] | III | I1 | R1 | C1 | M1 | A1 | N1 | T1 | E1 | H1 | KJ752963 |
| 108 | RVA/Human-wt/ZAF/MRC-DPRU400/2003/G1P[8]  | G1 | II | P[8] | III | I1 | R1 | C1 | M1 | A1 | N1 | T1 | E1 | H1 | KJ752421 |
| 109 | RVA/Human-wt/ZAF/MRC-DPRU2198/2003/G1P[8] | G1 | II | P[8] | III | I1 | R1 | C1 | M1 | A1 | N1 | T1 | E1 | H1 | KJ752333 |
| 110 | RVA/Human-wt/ZAF/MRC-DPRU648/2003/G1P[8]  | G1 | II | P[8] | III | I1 | R1 | C1 | M1 | A1 | N1 | T1 | E1 | H1 | KJ752524 |
| 111 | RVA/Human-wt/ZAF/MRC-DPRU451/2003/G1P[8]  | G1 | II | P[8] | III | I1 | R1 | C1 | M1 | A1 | N1 | T1 | E1 | H1 | KJ753506 |
| 112 | RVA/Human-wt/ZAF/MRC-DPRU4445/2003/G1P[8] | G1 | II | P[8] | III | I1 | R1 | C1 | M1 | A1 | N1 | T1 | E1 | H1 | KJ753770 |
| 113 | RVA/Human-wt/ZAF/MRC-DPRU2218/2003/G1P[8] | G1 | II | P[8] | III | I1 | R1 | C1 | M1 | A1 | N1 | T1 | E1 | H1 | KJ752808 |
| 114 | RVA/Human-wt/ZAF/MRC-DPRU566/2003/G1P[8]  | G1 | II | P[8] | III | I1 | R1 | C1 | M1 | A1 | N1 | T1 | E1 | H1 | KJ751685 |
| 115 | RVA/Human-wt/ZAF/MRC-DPRU539/2003/G1P[8]  | G1 | II | P[8] | III | I1 | R1 | C1 | M1 | A1 | N1 | T1 | E1 | H1 | KJ753846 |
| 116 | RVA/Human-wt/ZAF/MRC-DPRU426/2004/G1P[8]  | G1 | II | P[8] | III | I1 | R1 | C1 | M1 | A1 | N1 | T1 | E1 | H1 | KJ752568 |
| 117 | RVA/Human-wt/ZAF/MRC-DPRU1224/2004/G1P[8] | G1 | II | P[8] | III | I1 | R1 | C1 | M1 | A1 | N1 | T1 | E1 | H1 | KJ752874 |
| 118 | RVA/Human-wt/ZAF/MRC-DPRU1285/2004/G1P[8] | G1 | II | P[8] | III | I1 | R1 | C1 | M1 | A1 | N1 | T1 | E1 | H1 | KJ753098 |
| 119 | RVA/Human-wt/ZAF/MRC-DPRU1275/2004/G1P[8] | G1 | II | P[8] | III | I1 | R1 | C1 | M1 | A1 | N1 | T1 | E1 | H1 | KJ753242 |
| 120 | RVA/Human-wt/ZAF/MRC-DPRU1264/2004/G1P[8] | G1 | II | P[8] | III | I1 | R1 | C1 | M1 | A1 | N1 | T1 | E1 | H1 | KJ753308 |
| 121 | RVA/Human-wt/ZAF/MRC-DPRU1299/2004/G1P[8] | G1 | II | P[8] | III | I1 | R1 | C1 | M1 | A1 | N1 | T1 | E1 | H1 | KJ753587 |
| 122 | RVA/Human-wt/ZAF/MRC-DPRU1283/2004/G1P[8] | G1 | II | P[8] | III | I1 | R1 | C1 | M1 | A1 | N1 | T1 | E1 | H1 | KJ753621 |
| 123 | RVA/Human-wt/ZAF/MRC-DPRU1277/2004/G1P[8] | G1 | II | P[8] | III | I1 | R1 | C1 | M1 | A1 | N1 | T1 | E1 | H1 | KJ753679 |
| 124 | RVA/Human-wt/ZAF/MRC-DPRU1280/2004/G1P[8] | G1 | II | P[8] | III | I1 | R1 | C1 | M1 | A1 | N1 | T1 | E1 | H1 | KJ753781 |
| 125 | RVA/Human-wt/ZAF/MRC-DPRU822/2005/G1P[8]  | G1 | I  | P[8] | III | I1 | R1 | C1 | M1 | A1 | N1 | T1 | E1 | H1 | KJ751976 |
| 126 | RVA/Human-wt/ZAF/MRC-DPRU1232/2005/G1P[8] | G1 | I  | P[8] | IV  | I1 | R1 | C1 | M1 | A1 | N1 | T1 | E1 | H1 | KJ753163 |
| 127 | RVA/Human-wt/ZAF/MRC-DPRU2114/2005/G1P[8] | G1 | I  | P[8] | IV  | I1 | R1 | C1 | M1 | A1 | N1 | T1 | E1 | H1 | KJ752078 |
| 128 | RVA/Human-wt/ZAF/MRC-DPRU799/2006/G1P[8]  | G1 | I  | P[8] | III | I1 | R1 | C1 | M1 | A1 | N1 | T1 | E1 | H1 | KJ752177 |
| 129 | RVA/Human-wt/ZAF/MRC-DPRU789/2006/G1P[8]  | G1 | I  | P[8] | III | I1 | R1 | C1 | M1 | A1 | N1 | T1 | E1 | H1 | KJ752311 |
| 130 | RVA/Human-wt/ZAF/MRC-DPRU748/2006/G1P[8]  | G1 | I  | P[8] | III | I1 | R1 | C1 | M1 | A1 | N1 | T1 | E1 | H1 | KJ753462 |
| 131 | RVA/Human-wt/ZAF/MRC-DPRU539/2006/G1P[8]  | G1 | I  | P[8] | III | I1 | R1 | C1 | M1 | A1 | N1 | T1 | E1 | H1 | KJ753565 |
| 132 | RVA/Human-wt/ZAF/MRC-DPRU757/2006/G1P[8]  | G1 | I  | P[8] | III | I1 | R1 | C1 | M1 | A1 | N1 | T1 | E1 | H1 | KP752839 |
| 133 | RVA/Human-wt/ZAF/MRC-DPRU832/2006/G1P[8]  | G1 | I  | P[8] | III | I1 | R1 | C1 | M1 | A1 | N1 | T1 | E1 | H1 | KP752998 |
| 134 | RVA/Human-wt/ZAF/MRC-DPRU901/2006/G1P[8]  | G1 | I  | P[8] | III | I1 | R1 | C1 | M1 | A1 | N1 | T1 | E1 | H1 | KP752587 |
| 135 | RVA/Human-wt/ZAF/MRC-DPRU840/2006/G1P[8]  | G1 | I  | P[8] | III | I1 | R1 | C1 | M1 | A1 | N1 | T1 | E1 | H1 | KJ753152 |
| 136 | RVA/Human-wt/ZAF/MRC-DPRU803/2006/G1P[8]  | G1 | I  | P[8] | III | I1 | R1 | C1 | M1 | A1 | N1 | T1 | E1 | H1 | KJ752895 |
| 137 | RVA/Human-wt/ZAF/MRC-DPRU1840/2007/G1P[8] | G1 | I  | P[8] | IV  | I1 | R1 | C1 | M1 | A1 | N1 | T1 | E1 | H1 | KJ753384 |
| 138 | RVA/Human-wt/ZAF/MRC-DPRU1327/2007/G1P[8] | G1 | I  | P[8] | III | I1 | R1 | C1 | M1 | A1 | N1 | T1 | E1 | H1 | KJ753220 |
| 139 | RVA/Human-wt/ZAF/MRC-DPRU1370/2007/G1P[8] | G1 | I  | P[8] | III | I1 | R1 | C1 | M1 | A1 | N1 | T1 | E1 | H1 | KJ753065 |
| 140 | RVA/Human-wt/ZAF/MRC-DPRU1350/2007/G1P[8] | G1 | II | P[8] | III | I1 | R1 | C1 | M1 | A1 | N1 | T1 | E1 | H1 | KJ753805 |
| 141 | RVA/Human-wt/ZAF/MRC-DPRU1381/2007/G1P[8] | G1 | I  | P[8] | III | I1 | R1 | C1 | M1 | A1 | N1 | T1 | E1 | H1 | KJ752700 |
| 142 | RVA/Human-wt/ZAF/MRC-DPRU1960/2008/G1P[8] | G1 | I  | P[8] | III | I1 | R1 | C1 | M1 | A1 | N1 | T1 | E1 | H1 | KJ751905 |
| 143 | RVA/Human-wt/ZAF/MRC-DPRU1039/2008/G1P[8] | G1 | I  | P[8] | III | I1 | R1 | C1 | M1 | A1 | N1 | T1 | E1 | H1 | KJ752199 |
| 144 | RVA/Human-wt/ZAF/MRC-DPRU1052/2008/G1P[8] | G1 | I  | P[8] | III | I1 | R1 | C1 | M1 | A1 | N1 | T1 | E1 | H1 | KJ752278 |
| 145 | RVA/Human-wt/ZAF/MRC-DPRU2429/2008/G1P[8] | G1 | I  | P[8] | III | I1 | R1 | C1 | M1 | A1 | N1 | T1 | E1 | H1 | KJ752841 |
| 146 | RVA/Human-wt/ZAF/MRC-DPRU2125/2008/G1P[8] | G1 | I  | P[8] | III | I1 | R1 | C1 | M1 | A1 | N1 | T1 | E1 | H1 | KP752893 |
| 147 | RVA/Human-wt/ZAF/MRC-DPRU1270/2009/G1P[8] | G1 | II | P[8] | III | I1 | R1 | C1 | M1 | A1 | N1 | T1 | E1 | H1 | KJ751696 |
| 148 | RVA/Human-wt/ZAF/MRC-DPRU1389/2009/G1P[8] | G1 | II | P[8] | III | I1 | R1 | C1 | M1 | A1 | N1 | T1 | E1 | H1 | KJ751839 |
| 149 | RVA/Human-wt/ZAF/MRC-DPRU2801/2009/G1P[8] | G1 | II | P[8] | III | I1 | R1 | C1 | M1 | A1 | N1 | T1 | E1 | H1 | KJ753209 |
| 150 | RVA/Human-wt/ZAF/MRC-DPRU150/2009/G1P[8]  | G1 | II | P[8] | III | I1 | R1 | C1 | M1 | A1 | N1 | T1 | E1 | H1 | KJ753231 |
| 151 | RVA/Human-wt/ZAF/MRC-DPRU155/2009/G1P[8]  | G1 | II | P[8] | III | I1 | R1 | C1 | M1 | A1 | N1 | T1 | E1 | H1 | KJ753743 |
| 152 | RVA/Human-wt/ZAF/MRC-DPRU2294/2009/G1P[8] | G1 | II | P[8] | III | I1 | R1 | C1 | M1 | A1 | N1 | T1 | E1 | H1 | KJ751751 |
| 153 | RVA/Human-wt/ZAF/MRC-DPRU1269/2009/G1P[8] | G1 | II | P[8] | III | I1 | R1 | C1 | M1 | A1 | N1 | T1 | E1 | H1 | KJ753754 |
| 154 | RVA/Human-wt/ZAF/MRC-DPRU2325/2009/G1P[8] | G1 | I  | P[8] | III | I1 | R1 | C1 | M1 | A1 | N1 | T1 | E1 | H1 | KF636162 |
| 155 | RVA/Human-wt/ZAF/MRC-DPRU2306/2009/G1P[8] | G1 | I  | P[8] | III | I1 | R1 | C1 | M1 | A1 | N1 | T1 | E1 | H1 | KF636173 |
| 156 | RVA/Human-wt/ZAF/MRC-DPRU2330/2009/G1P[8] | G1 | I  | P[8] | III | I1 | R1 | C1 | M1 | A1 | N1 | T1 | E1 | H1 | KF636272 |
| 157 | RVA/Human-wt/ZAF/MRC-DPRU1217/2009/G1P[8] | G1 | I  | P[8] | III | I1 | R1 | C1 | M1 | A1 | N1 | T1 | E1 | H1 | KJ753451 |
| 158 | RVA/Human-wt/ZAF/MRC-DPRU135/2009/G1P[8]  | G1 | I  | P[8] | III | I1 | R1 | C1 | M1 | A1 | N1 | T1 | E1 | H1 | KJ753087 |
| 159 | RVA/Human-wt/ZAF/MRC-DPRU1923/2009/G1P[8] | G1 | I  | P[8] | III | I1 | R1 | C1 | M1 | A1 | N1 | T1 | E1 | H1 | KP752987 |

Post-vaccine strains

|     |                                             |    |    |      |     |    |    |    |    |    |    |    |    |    |          |
|-----|---------------------------------------------|----|----|------|-----|----|----|----|----|----|----|----|----|----|----------|
| 160 | RVA/Human-wt/ZAF/MRC-DPRU2030/2010/G1P[8]   | G1 | I  | P[8] | III | I1 | R1 | C1 | M1 | A1 | N1 | T1 | E1 | H1 | KF636206 |
| 161 | RVA/Human-wt/ZAF/MRC-DPRU2035/2010/G1P[8]   | G1 | I  | P[8] | III | I1 | R1 | C1 | M1 | A1 | N1 | T1 | E1 | H1 | KF636239 |
| 162 | RVA/Human-wt/ZAF/MRC-DPRU2052/2010/G1P[8]   | G1 | I  | P[8] | III | I1 | R1 | C1 | M1 | A1 | N1 | T1 | E1 | H1 | KF636283 |
| 163 | RVA/Human-wt/ZAF/MRC-DPRU1506/2010/G1P[8]   | G1 | I  | P[8] | III | I1 | R1 | C1 | M1 | A1 | N1 | T1 | E1 | H1 | KJ753198 |
| 164 | RVA/Human-wt/ZAF/MRC-DPRU1544/2010/G1P[8]   | G1 | I  | P[8] | III | I1 | R1 | C1 | M1 | A1 | N1 | T1 | E1 | H1 | KF636217 |
| 165 | RVA/Human-wt/ZAF/MRC-DPRU2061/2010/G1P[8]   | G1 | I  | P[8] | III | I1 | R1 | C1 | M1 | A1 | N1 | T1 | E1 | H1 | KF636184 |
| 166 | RVA/Human-wt/ZAF/MRC-DPRU1492/2010/G1P[8]   | G1 | I  | P[8] | III | I1 | R1 | C1 | M1 | A1 | N1 | T1 | E1 | H1 | KF636195 |
| 167 | RVA/Human-wt/ZAF/MRC-DPRU832011/G1P[8]      | G1 | II | P[8] | III | I1 | R1 | C1 | M1 | A1 | N1 | T1 | E1 | H1 | KJ752985 |
| 168 | RVA/Human-wt/ZAF/MRC-DPRU6954/2011/G1P[8]   | G1 | I  | P[8] | III | I1 | R1 | C1 | M1 | A1 | N1 | T1 | E1 | H1 | KJ752020 |
| 169 | RVA/Human-wt/ZAF/MRC-DPRU120/2011/G1P[8]    | G1 | I  | P[8] | III | I1 | R1 | C1 | M1 | A1 | N1 | T1 | E1 | H1 | KJ752155 |
| 170 | RVA/Human-wt/ZAF/MRC-DPRU121/2011/G1P[8]    | G1 | I  | P[8] | III | I1 | R1 | C1 | M1 | A1 | N1 | T1 | E1 | H1 | KJ752590 |
| 171 | RVA/Human-wt/ZAF/MRC-DPRU4079-1/2011/G1P[8] | G1 | I  | P[8] | III | I1 | R1 | C1 | M1 | A1 | N1 | T1 | E1 | H1 | KJ753576 |
